# Supplementary material for: Selective 1D TOCSY NMR method for the determination of glutathione in white wine
Source: Royal Society of Chemistry journal article supplement (doi:10.1039/c7ay01463e), 2017-01-01
Supplement: c7ay01463e1.pdf [file c7ay01463e1.pdf]

## Electronic Supplementary Information (ESI)

### Selective 1D TOCSY NMR method for the determination of glutathione in white wine<sup>§</sup>

Vassiliki G. Kontogianni,<sup>‡a</sup> Constantinos G. Tsiafoulis,<sup>‡b</sup> Ioannis G. Roussis,<sup>\*,c</sup> Ioannis P. Gerothanassis<sup>\*,a</sup>

<sup>a</sup> Section of Organic Chemistry and Biochemistry, Department of Chemistry, University of Ioannina, Ioannina, GR-45110, Greece

E-mail: [igeroth@uoi.gr](mailto:igeroth@uoi.gr)

<sup>b</sup> Laboratory of Analytical Chemistry; Department of Chemistry and NMR Center; University of Ioannina, Ioannina, GR-45110, Greece

<sup>c</sup> Laboratory of Food Chemistry, Department of Chemistry; University of Ioannina, Ioannina, GR-45110, Greece

E-mail: [iroussis@uoi.gr](mailto:iroussis@uoi.gr)

<sup>‡</sup>Both authors contributed equally to this manuscript.

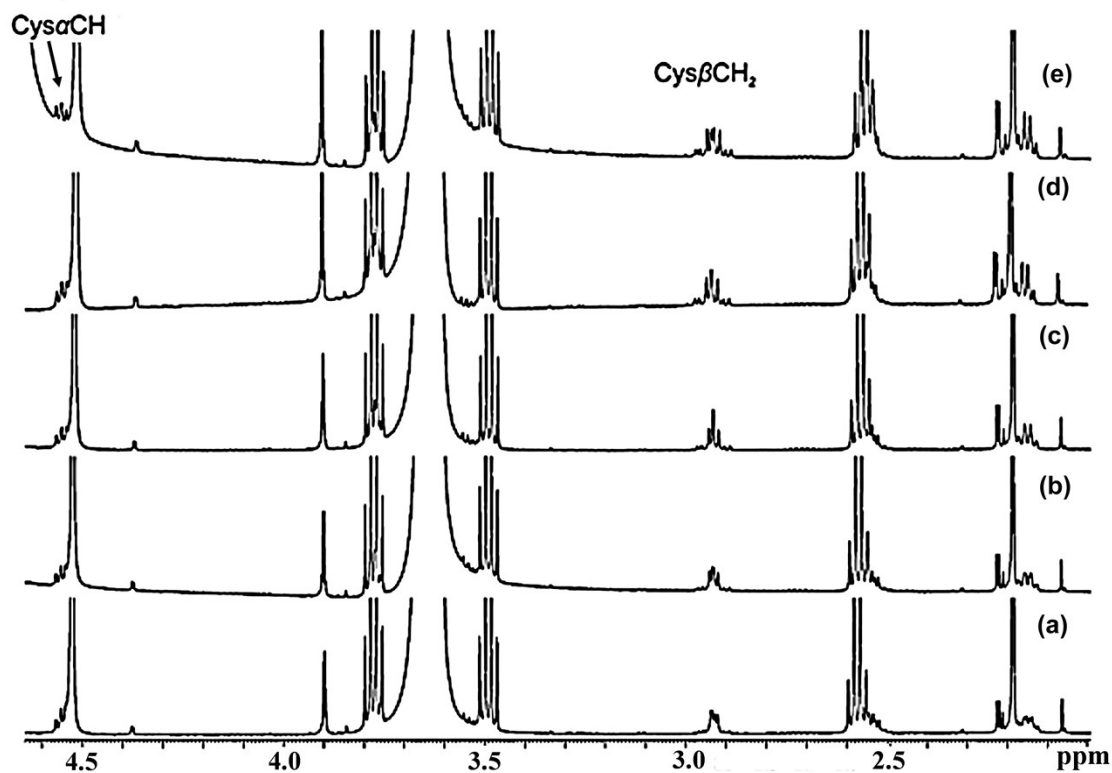

**Fig. S1** Selected region of 500 MHz <sup>1</sup>H NMR spectra of model wine (pD = 3.5) with 2 mM of glutathione at various temperatures: 288 K (a), 293 K (b), 298 K (c), 303 K (d) and 308 K (e) (acquisition time = 2.74 s, relaxation delay = 5 s, numbers of scans = 64, experimental time ≈ 8.3 min).

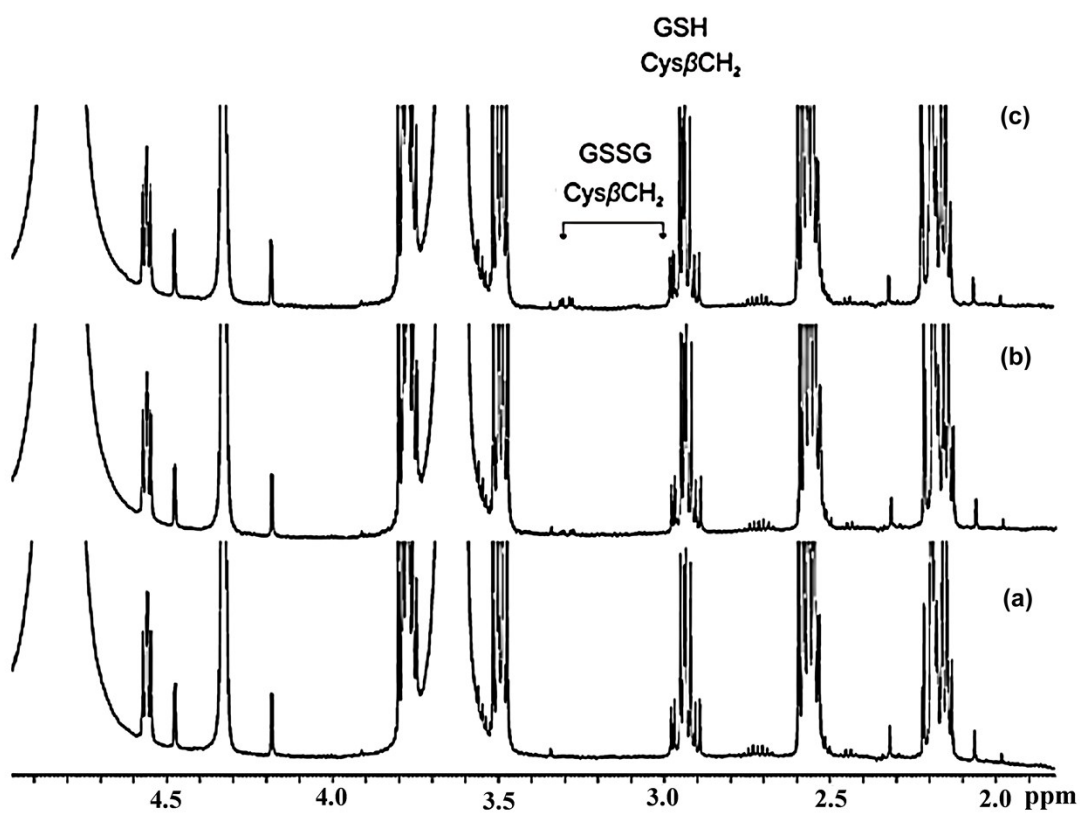

**Fig S2** Selected region of 500 MHz <sup>1</sup>H NMR spectra of model wine with 2.1 mM of GSH at pD=5.0, recorded at different time intervals: (a) immediately after preparation of the solution, (b) and (c) after 14 h and 34 h, respectively (T = 298 K, acquisition time = 2.74 s, relaxation delay = 5 s, number of scans = 64, experimental time ≈ 8.3 min).

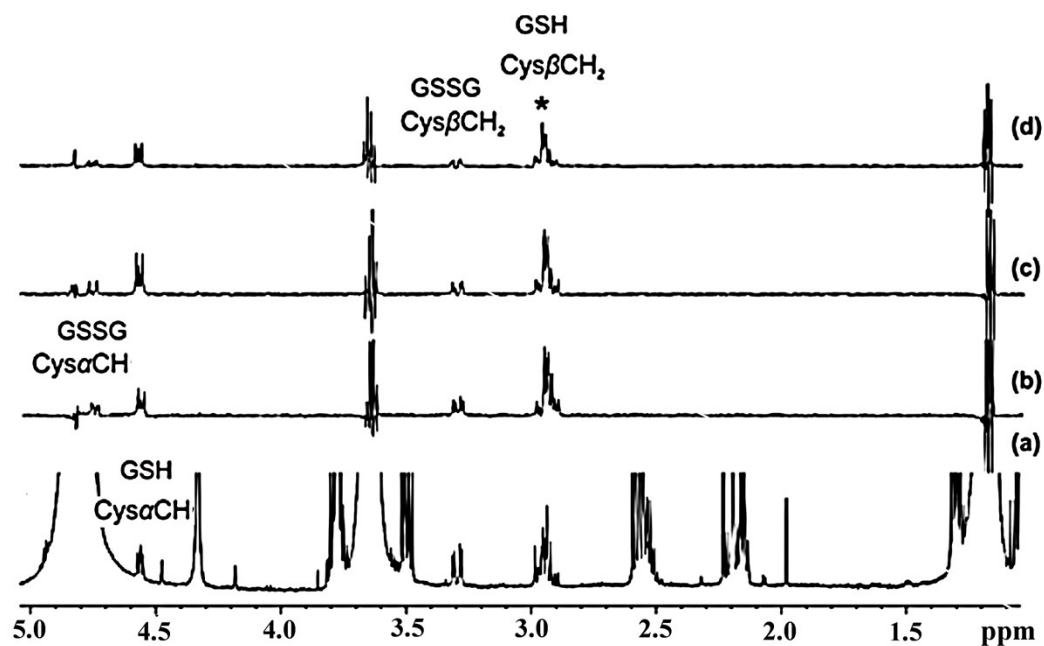

**Fig S3** (a) Selective region of 500 MHz  $^1\text{H}$  NMR spectrum of model wine with a mixture of reduced (1.4 mM) and oxidized (2 mM) glutathione, at pD = 5.0 ( $T = 298\text{ K}$ , acquisition time = 2.74 s, relaxation delay = 5 s, numbers of scans = 64, experimental time  $\sim 8\text{ min}$ ). (b) - (d). A series of selective 1D TOCSY spectra of the solution (a) with mixing times  $\tau_m = 38\text{ ms}$  (b), 50 ms (c), and 150 ms (d), with the selective pulse at 2.95 ppm (denoted with an asterisk) ( $T = 298\text{ K}$ , acquisition time = 2.74 s, relaxation delay = 15 s, number of scans = 16, experimental time  $\approx 4.7\text{ min}$ ).

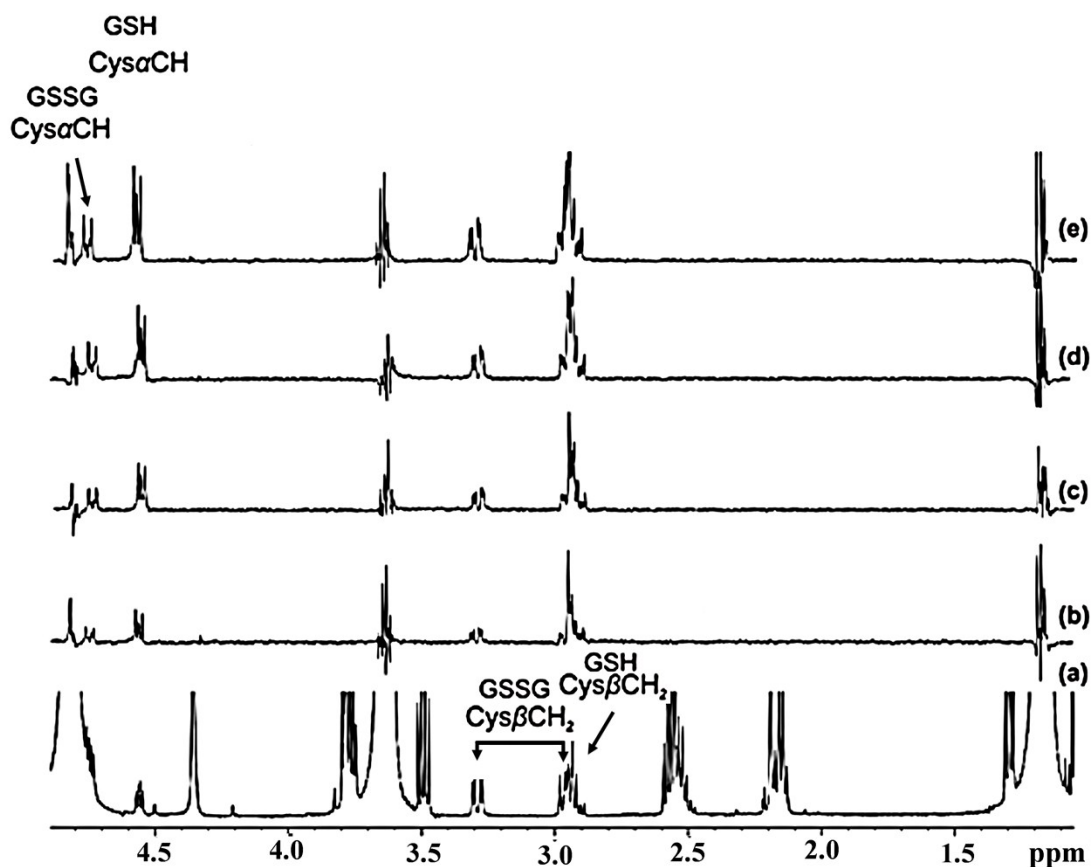

**Fig. S4** (a) Selective region of 500 MHz  $^1\text{H}$  NMR spectrum of model wine with a mixture of reduced (0.68 mM) and oxidized (0.68 mM) glutathione, at pD = 5.0 (T= 298 K, acquisition time = 2.74. s, relaxation delay = 5 s, number of scans= 8, experimental time = 1 min). (b) – (e) A series of selective 1D TOCSY spectra of the solution (a) used for the calibration curve: 0.68 (b), 1.29 (c), 1.85 (d) and 2.67 (e) mM for GSH and 0.68 (b), 1.30 (c), 1.86 (d) and 2.69 (e) mM for GSSG) (T= 298 K, acquisition time= 2.74 s, relaxation delay= 15 s, number of scans= 16, mixing time  $\tau_m$ = 50 ms, experimental time  $\approx$  6 min).
